# Supplementary material for: Long COVID Risk and Pre-COVID Vaccination: An EHR-Based Cohort Study from the RECOVER Program
Source: PubMed Central journal article supplement — medRxiv. 2022 Oct 7:2022.10.06.22280795. Preprint. [Version 1] doi: 10.1101/2022.10.06.22280795 (PMC9558440; doi:10.1101/2022.10.06.22280795), 2022-10-07
Supplement: media-1.pdf [file media-1.pdf]

# Online Supplement

**eTable 1. Model-Based IPTW Model Coefficients**

| <b>Covariate</b>                 | <b>Coefficient</b> | <b>Standard Error</b> | <b>95% CI Low</b> | <b>95% CI High</b> |
|----------------------------------|--------------------|-----------------------|-------------------|--------------------|
| Age: 18-24                       | -0.79              | 0.02                  | -0.83             | -0.75              |
| Age: 25-34                       | -0.43              | 0.02                  | -0.46             | -0.40              |
| Age: 50-64                       | 0.43               | 0.01                  | 0.41              | 0.46               |
| Age: 65+                         | 1.07               | 0.02                  | 1.04              | 1.10               |
| Acute Kidney Injury              | -0.23              | 0.03                  | -0.29             | -0.17              |
| CCI: 1-2                         | 0.06               | 0.01                  | 0.03              | 0.09               |
| CCI: 3-4                         | 0.13               | 0.02                  | 0.08              | 0.18               |
| CCI: 5-10                        | 0.17               | 0.03                  | 0.11              | 0.23               |
| CCI: 11+                         | 0.19               | 0.09                  | 0.03              | 0.36               |
| Chronic Lung Disease             | 0.04               | 0.02                  | 0.00              | 0.07               |
| Congestive Heart Failure         | 0.10               | 0.06                  | -0.01             | 0.22               |
| COVID In Sep 2021                | 0.13               | 0.02                  | 0.10              | 0.16               |
| COVID In Oct 2021                | 0.32               | 0.02                  | 0.29              | 0.36               |
| COVID In Nov 2021                | 0.40               | 0.02                  | 0.37              | 0.44               |
| COVID In Dec 2021                | 0.70               | 0.02                  | 0.66              | 0.73               |
| COVID In Jan 2022                | 1.28               | 0.02                  | 1.24              | 1.32               |
| Data Partner A                   | 0.35               | 0.03                  | 0.29              | 0.40               |
| Data Partner B                   | 0.26               | 0.06                  | 0.14              | 0.37               |
| Data Partner C                   | 0.35               | 0.04                  | 0.27              | 0.43               |
| Data Partner D                   | 0.70               | 0.07                  | 0.57              | 0.84               |
| Data Partner E                   | 0.46               | 0.06                  | 0.36              | 0.57               |
| Data Partner F                   | 0.10               | 0.03                  | 0.05              | 0.15               |
| Data Partner G                   | 0.72               | 0.03                  | 0.66              | 0.79               |
| Data Partner H                   | -0.12              | 0.05                  | -0.21             | -0.02              |
| Data Partner I                   | 0.54               | 0.05                  | 0.45              | 0.64               |
| Data Partner K                   | 0.03               | 0.02                  | -0.01             | 0.06               |
| Diabetes Complicated             | 0.05               | 0.03                  | 0.01              | 0.10               |
| Diabetes Uncomplicated           | 0.08               | 0.02                  | 0.04              | 0.12               |
| Gender: Male                     | -0.14              | 0.01                  | -0.16             | -0.12              |
| Heart Failure                    | -0.09              | 0.05                  | -0.19             | 0.01               |
| Immunocompromised                | 0.57               | 0.05                  | 0.47              | 0.68               |
| Intercept                        | -1.09              | 0.02                  | -1.13             | -1.05              |
| Kidney Disease                   | 0.18               | 0.02                  | 0.14              | 0.23               |
| Myocardial Infarction            | -0.15              | 0.03                  | -0.21             | -0.08              |
| Race/Ethnicity: Asian            | 0.90               | 0.04                  | 0.82              | 0.99               |
| Race/Ethnicity: Black            | -0.43              | 0.02                  | -0.47             | -0.40              |
| Race/Ethnicity: Hispanic         | 0.14               | 0.02                  | 0.10              | 0.18               |
| Race/Ethnicity: Pacific Islander | -0.20              | 0.14                  | -0.47             | 0.06               |
| Race/Ethnicity: Other            | -0.39              | 0.04                  | -0.46             | -0.32              |
| Race/Ethnicity: Unknown          | -0.02              | 0.04                  | -0.11             | 0.07               |
| SDOH: 0-45                       | -0.30              | 0.07                  | -0.44             | -0.16              |
| SDOH: 56-65                      | 0.69               | 0.02                  | 0.66              | 0.72               |
| SDOH: 65+                        | 1.11               | 0.03                  | 1.04              | 1.17               |
| SDOH: Missing                    | 0.20               | 0.03                  | 0.15              | 0.25               |
| SDOH: Other                      | 0.20               | 0.02                  | 0.17              | 0.24               |
| Tobacco Smoker                   | -0.55              | 0.03                  | -0.60             | -0.50              |

**eTable 2. Clinic-Based IPTW Model Coefficients**

| <b>Covariate</b>                 | <b>Coefficient</b> | <b>Standard Error</b> | <b>95% CI Low</b> | <b>95% CI High</b> |
|----------------------------------|--------------------|-----------------------|-------------------|--------------------|
| Age: 18-24                       | -0.75              | 0.04                  | -0.83             | -0.67              |
| Age: 25-34                       | -0.34              | 0.03                  | -0.40             | -0.28              |
| Age: 50-64                       | 0.24               | 0.03                  | 0.18              | 0.29               |
| Age: 65+                         | 0.69               | 0.03                  | 0.63              | 0.76               |
| Acute Kidney Injury              | -0.30              | 0.05                  | -0.39             | -0.20              |
| CCI: 1-2                         | 0.09               | 0.03                  | 0.04              | 0.15               |
| CCI: 3-4                         | 0.18               | 0.04                  | 0.09              | 0.26               |
| CCI: 5-10                        | 0.25               | 0.05                  | 0.14              | 0.35               |
| CCI: 11+                         | 0.28               | 0.12                  | 0.04              | 0.51               |
| Chronic Lung Disease             | 0.06               | 0.03                  | 0.00              | 0.11               |
| Congestive Heart Failure         | 0.10               | 0.10                  | -0.10             | 0.30               |
| COVID In Sep 2021                | 0.17               | 0.04                  | 0.10              | 0.24               |
| COVID In Oct 2021                | 0.33               | 0.04                  | 0.25              | 0.42               |
| COVID In Nov 2021                | 0.38               | 0.05                  | 0.29              | 0.47               |
| COVID In Dec 2021                | 0.89               | 0.04                  | 0.82              | 0.96               |
| COVID In Jan 2022                | 1.29               | 0.03                  | 1.23              | 1.35               |
| Data Partner A                   | 0.28               | 0.03                  | 0.22              | 0.33               |
| Data Partner C                   | 0.28               | 0.04                  | 0.20              | 0.36               |
| Data Partner D                   | 0.62               | 0.07                  | 0.49              | 0.76               |
| Data Partner G                   | 0.62               | 0.03                  | 0.55              | 0.69               |
| Data Partner I                   | 0.59               | 0.05                  | 0.49              | 0.69               |
| Diabetes Complicated             | 0.10               | 0.05                  | 0.01              | 0.19               |
| Diabetes Uncomplicated           | 0.09               | 0.04                  | 0.01              | 0.17               |
| Gender: Male                     | -0.19              | 0.02                  | -0.23             | -0.14              |
| Heart Failure                    | -0.09              | 0.09                  | -0.27             | 0.09               |
| Immunocompromised                | 0.81               | 0.08                  | 0.67              | 0.96               |
| Intercept                        | -0.95              | 0.04                  | -1.03             | -0.88              |
| Kidney Disease                   | 0.19               | 0.04                  | 0.11              | 0.27               |
| Myocardial Infarction            | -0.11              | 0.05                  | -0.22             | -0.01              |
| Race/Ethnicity: Asian            | 0.66               | 0.09                  | 0.49              | 0.83               |
| Race/Ethnicity: Black            | -0.36              | 0.03                  | -0.41             | -0.31              |
| Race/Ethnicity: Hispanic         | -0.24              | 0.04                  | -0.33             | -0.16              |
| Race/Ethnicity: Pacific Islander | -0.52              | 0.25                  | -1.02             | -0.02              |
| Race/Ethnicity: Other            | -0.68              | 0.07                  | -0.82             | -0.55              |
| Race/Ethnicity: Unknown          | -0.23              | 0.07                  | -0.36             | -0.10              |
| SDOH: 0-45                       | -0.51              | 0.18                  | -0.87             | -0.16              |
| SDOH: 56-65                      | 0.69               | 0.02                  | 0.65              | 0.74               |
| SDOH: 65+                        | 1.33               | 0.06                  | 1.22              | 1.44               |
| SDOH: Missing                    | -0.40              | 0.08                  | -0.56             | -0.25              |
| SDOH: Other                      | -0.06              | 0.05                  | -0.15             | 0.04               |
| Tobacco Smoker                   | -0.65              | 0.03                  | -0.72             | -0.58              |

**eTable 3. Model-based Logistic Regression, All Coefficients**

| <b>Covariate</b>                 | <b>Coefficient</b> | <b>Standard Error</b> | <b>95% CI Low</b> | <b>95% CI High</b> |
|----------------------------------|--------------------|-----------------------|-------------------|--------------------|
| Age: 18-24                       | -1.45              | 0.14                  | -1.72             | -1.17              |
| Age: 25-34                       | -0.80              | 0.07                  | -0.94             | -0.65              |
| Age: 50-64                       | 0.17               | 0.05                  | 0.08              | 0.27               |
| Age: 65+                         | 0.16               | 0.06                  | 0.04              | 0.28               |
| Acute Kidney Injury              | 0.27               | 0.09                  | 0.09              | 0.46               |
| Chronic Lung Disease             | 1.06               | 0.05                  | 0.96              | 1.15               |
| Congestive Heart Failure         | -0.25              | 0.16                  | -0.56             | 0.06               |
| COVID In Sep 2021                | -0.06              | 0.05                  | -0.16             | 0.05               |
| COVID In Oct 2021                | -0.21              | 0.07                  | -0.34             | -0.07              |
| COVID In Nov 2021                | -0.17              | 0.07                  | -0.32             | -0.03              |
| COVID In Dec 2021                | -0.32              | 0.07                  | -0.45             | -0.18              |
| COVID In Jan 2022                | -0.78              | 0.07                  | -0.92             | -0.64              |
| Data Partner A                   | 0.11               | 0.08                  | -0.05             | 0.27               |
| Data Partner B                   | -0.18              | 0.22                  | -0.60             | 0.24               |
| Data Partner C                   | -0.12              | 0.13                  | -0.37             | 0.13               |
| Data Partner D                   | -0.78              | 0.23                  | -1.22             | -0.33              |
| Data Partner E                   | -0.61              | 0.23                  | -1.06             | -0.17              |
| Data Partner F                   | -0.50              | 0.07                  | -0.64             | -0.36              |
| Data Partner G                   | -0.02              | 0.12                  | -0.26             | 0.21               |
| Data Partner H                   | 0.01               | 0.13                  | -0.26             | 0.27               |
| Data Partner I                   | 0.94               | 0.14                  | 0.67              | 1.21               |
| Data Partner K                   | -1.54              | 0.05                  | -1.64             | -1.43              |
| Diabetes Complicated             | -0.08              | 0.09                  | -0.26             | 0.10               |
| Diabetes Uncomplicated           | 0.28               | 0.08                  | 0.13              | 0.43               |
| Gender: Male                     | -0.21              | 0.04                  | -0.30             | -0.13              |
| Heart Failure                    | 0.64               | 0.13                  | 0.38              | 0.90               |
| Immunocompromised                | 0.00               | 0.12                  | -0.23             | 0.23               |
| Intercept                        | -3.08              | 0.07                  | -3.21             | -2.95              |
| Kidney Disease                   | 0.03               | 0.09                  | -0.16             | 0.21               |
| Myocardial Infarction            | -0.06              | 0.10                  | -0.26             | 0.13               |
| Race/Ethnicity: Asian            | 0.11               | 0.27                  | -0.41             | 0.64               |
| Race/Ethnicity: Black            | 0.01               | 0.05                  | -0.10             | 0.11               |
| Race/Ethnicity: Hispanic         | -0.14              | 0.09                  | -0.31             | 0.03               |
| Race/Ethnicity: Pacific Islander | 0.38               | 0.28                  | -0.16             | 0.93               |
| Race/Ethnicity: Other            | -0.43              | 0.17                  | -0.77             | -0.09              |
| Race/Ethnicity: Unknown          | -0.12              | 0.17                  | -0.45             | 0.20               |
| Tobacco Smoker                   | -0.03              | 0.07                  | -0.16             | 0.10               |
| Vaccination Status               | -0.36              | 0.04                  | -0.44             | -0.28              |

**eTable 4. Clinic-based Logistic Regression, All Coefficients**

| <b>Covariate</b>         | <b>Coefficient</b> | <b>Standard Error</b> | <b>95% CI Low</b> | <b>95% CI High</b> |
|--------------------------|--------------------|-----------------------|-------------------|--------------------|
| Age: 18-24               | -1.19              | 0.25                  | -1.67             | -0.71              |
| Age: 25-34               | -0.63              | 0.15                  | -0.93             | -0.33              |
| Age: 50-64               | 0.16               | 0.12                  | -0.06             | 0.39               |
| Age: 65+                 | 0.25               | 0.13                  | 0.00              | 0.50               |
| Acute Kidney Injury      | 0.31               | 0.19                  | -0.06             | 0.68               |
| Chronic Lung Disease     | 0.69               | 0.11                  | 0.48              | 0.89               |
| Congestive Heart Failure | 0.34               | 0.36                  | -0.35             | 1.04               |
| COVID In Sep 2021        | -0.26              | 0.12                  | -0.49             | -0.02              |
| COVID In Oct 2021        | -0.41              | 0.17                  | -0.75             | -0.08              |
| COVID In Nov 2021        | -0.25              | 0.16                  | -0.57             | 0.06               |
| COVID In Dec 2021        | -0.54              | 0.15                  | -0.83             | -0.24              |
| COVID In Jan 2022        | -0.89              | 0.13                  | -1.15             | -0.64              |
| Data Partner A           | -0.17              | 0.13                  | -0.43             | 0.09               |
| Data Partner C           | 0.19               | 0.18                  | -0.16             | 0.54               |
| Data Partner D           | -0.06              | 0.27                  | -0.59             | 0.46               |
| Data Partner G           | 0.33               | 0.13                  | 0.08              | 0.59               |
| Data Partner I           | 1.34               | 0.16                  | 1.03              | 1.65               |
| Diabetes Complicated     | -0.10              | 0.19                  | -0.48             | 0.28               |
| Diabetes Uncomplicated   | 0.11               | 0.18                  | -0.24             | 0.46               |
| Gender: Male             | -0.11              | 0.10                  | -0.30             | 0.08               |
| Heart Failure            | -0.23              | 0.34                  | -0.90             | 0.44               |
| Immunocompromised        | 0.06               | 0.24                  | -0.42             | 0.53               |
| Intercept                | -3.73              | 0.12                  | -3.97             | -3.50              |
| Kidney Disease           | 0.16               | 0.15                  | -0.14             | 0.47               |
| Myocardial Infarction    | -0.48              | 0.24                  | -0.96             | -0.01              |
| Race/Ethnicity: Asian    | 0.32               | 0.31                  | -0.28             | 0.92               |
| Race/Ethnicity: Black    | -0.40              | 0.13                  | -0.67             | -0.14              |
| Race/Ethnicity: Hispanic | -0.11              | 0.19                  | -0.47             | 0.26               |
| Race/Ethnicity: Other    | 0.03               | 0.25                  | -0.47             | 0.53               |
| Race/Ethnicity: Unknown  | 0.06               | 0.25                  | -0.43             | 0.55               |
| Tobacco Smoker           | -0.22              | 0.15                  | -0.51             | 0.08               |
| Vaccination Status       | -0.36              | 0.09                  | -0.53             | -0.20              |

**eTable 5. Model-based Proportional Hazards, All Coefficients**

| <b>Covariate</b>         | <b>Coefficient</b> | <b>Standard Error</b> | <b>95% CI Low</b> | <b>95% CI High</b> |
|--------------------------|--------------------|-----------------------|-------------------|--------------------|
| Age: 18-24               | -2.70              | 0.42                  | -3.52             | -1.88              |
| Age: 25-34               | -0.89              | 0.10                  | -1.08             | -0.70              |
| Age: 50-64               | 0.25               | 0.07                  | 0.13              | 0.38               |
| Age: 65+                 | 0.27               | 0.08                  | 0.12              | 0.42               |
| Acute Kidney Injury      | 0.18               | 0.12                  | -0.05             | 0.41               |
| Chronic Lung Disease     | 1.02               | 0.06                  | 0.90              | 1.14               |
| Congestive Heart Failure | -0.28              | 0.16                  | -0.59             | 0.04               |
| COVID In Sep 2021        | -0.06              | 0.07                  | -0.21             | 0.08               |
| COVID In Oct 2021        | -0.11              | 0.09                  | -0.30             | 0.07               |
| COVID In Nov 2021        | 0.09               | 0.09                  | -0.09             | 0.27               |
| COVID In Dec 2021        | 0.16               | 0.09                  | -0.03             | 0.34               |
| COVID In Jan 2022        | -0.19              | 0.11                  | -0.42             | 0.03               |
| Data Partner A           | 0.33               | 0.09                  | 0.15              | 0.51               |
| Data Partner B           | -0.32              | 0.23                  | -0.77             | 0.12               |
| Data Partner C           | -0.13              | 0.16                  | -0.44             | 0.18               |
| Data Partner D           | 1.46               | 0.82                  | -0.15             | 3.06               |
| Data Partner E           | -0.52              | 0.38                  | -1.28             | 0.23               |
| Data Partner F           | -1.10              | 0.18                  | -1.45             | -0.74              |
| Data Partner G           | -0.10              | 0.18                  | -0.46             | 0.26               |
| Data Partner H           | 0.21               | 0.15                  | -0.08             | 0.51               |
| Data Partner I           | 0.64               | 0.20                  | 0.25              | 1.03               |
| Data Partner K           | -1.13              | 0.07                  | -1.27             | -0.98              |
| Diabetes Complicated     | -0.04              | 0.10                  | -0.24             | 0.17               |
| Diabetes Uncomplicated   | 0.27               | 0.09                  | 0.10              | 0.44               |
| Gender: Male             | 0.24               | 0.11                  | 0.02              | 0.46               |
| Heart Failure            | 0.65               | 0.15                  | 0.34              | 0.95               |
| Immunocompromised        | 0.15               | 0.16                  | -0.16             | 0.47               |
| Kidney Disease           | -0.07              | 0.11                  | -0.28             | 0.14               |
| Myocardial Infarction    | 0.03               | 0.12                  | -0.19             | 0.26               |
| Race/Ethnicity: Asian    | 0.33               | 0.38                  | -0.41             | 1.07               |
| Race/Ethnicity: Black    | 0.04               | 0.07                  | -0.09             | 0.17               |
| Race/Ethnicity: Hispanic | -0.12              | 0.12                  | -0.35             | 0.11               |
| Race/Ethnicity: Other    | -0.31              | 0.20                  | -0.71             | 0.09               |
| Race/Ethnicity: Unknown  | -0.16              | 0.27                  | -0.69             | 0.37               |
| Tobacco Smoker           | 0.02               | 0.09                  | -0.16             | 0.19               |
| Vaccination Status       | -0.47              | 0.05                  | -0.58             | -0.37              |
| Time * Gender: Male      | -0.00              | 0.00                  | -0.01             | -0.00              |
| Time * Age: 18-24        | 0.01               | 0.00                  | 0.00              | 0.02               |
| Time * Data Partner D    | -0.02              | 0.01                  | -0.04             | -0.00              |
| Time * Data Partner F    | 0.01               | 0.00                  | 0.00              | 0.01               |

**eTable 6. Clinic-based Proportional Hazards, All Coefficients**

| <b>Covariate</b>         | <b>Coefficient</b> | <b>Standard Error</b> | <b>95% CI Low</b> | <b>95% CI High</b> |
|--------------------------|--------------------|-----------------------|-------------------|--------------------|
| Age: 18-24               | -1.26              | 0.30                  | -1.86             | -0.67              |
| Age: 25-34               | -0.55              | 0.18                  | -0.91             | -0.19              |
| Age: 50-64               | 0.26               | 0.14                  | -0.01             | 0.53               |
| Age: 65+                 | 0.31               | 0.16                  | 0.00              | 0.62               |
| Acute Kidney Injury      | 0.41               | 0.19                  | 0.03              | 0.78               |
| Chronic Lung Disease     | 0.76               | 0.12                  | 0.52              | 0.99               |
| Congestive Heart Failure | 0.09               | 0.39                  | -0.68             | 0.86               |
| COVID In Sep 2021        | -0.06              | 0.14                  | -0.34             | 0.21               |
| COVID In Oct 2021        | -0.27              | 0.20                  | -0.67             | 0.13               |
| COVID In Nov 2021        | -0.13              | 0.21                  | -0.55             | 0.29               |
| COVID In Dec 2021        | -0.29              | 0.20                  | -0.67             | 0.09               |
| COVID In Jan 2022        | -0.48              | 0.15                  | -0.76             | -0.19              |
| Data Partner A           | -0.03              | 0.14                  | -0.30             | 0.23               |
| Data Partner C           | 0.26               | 0.22                  | -0.18             | 0.69               |
| Data Partner D           | -0.09              | 0.29                  | -0.66             | 0.48               |
| Data Partner G           | 0.18               | 0.17                  | -0.14             | 0.51               |
| Data Partner I           | 1.32               | 0.17                  | 0.98              | 1.66               |
| Diabetes Complicated     | -0.10              | 0.23                  | -0.56             | 0.35               |
| Diabetes Uncomplicated   | 0.10               | 0.21                  | -0.31             | 0.51               |
| Gender: Male             | -0.12              | 0.10                  | -0.32             | 0.09               |
| Heart Failure            | 0.00               | 0.36                  | -0.71             | 0.71               |
| Immunocompromised        | 0.09               | 0.24                  | -0.39             | 0.56               |
| Kidney Disease           | 0.16               | 0.16                  | -0.16             | 0.47               |
| Myocardial Infarction    | -0.56              | 0.25                  | -1.04             | -0.08              |
| Race/Ethnicity: Asian    | 0.52               | 0.44                  | -0.34             | 1.38               |
| Race/Ethnicity: Black    | -0.38              | 0.15                  | -0.68             | -0.09              |
| Race/Ethnicity: Hispanic | -0.16              | 0.22                  | -0.58             | 0.27               |
| Race/Ethnicity: Other    | 0.13               | 0.30                  | -0.45             | 0.72               |
| Race/Ethnicity: Unknown  | 0.23               | 0.31                  | -0.38             | 0.85               |
| Tobacco Smoker           | -0.26              | 0.18                  | -0.61             | 0.09               |
| Vaccination Status       | -0.41              | 0.10                  | -0.60             | -0.22              |

**eFigure 1. Differences in standardized covariates in the model-based cohort between vaccinated and unvaccinated groups before (unadjusted) and after (adjusted) IPTW.**

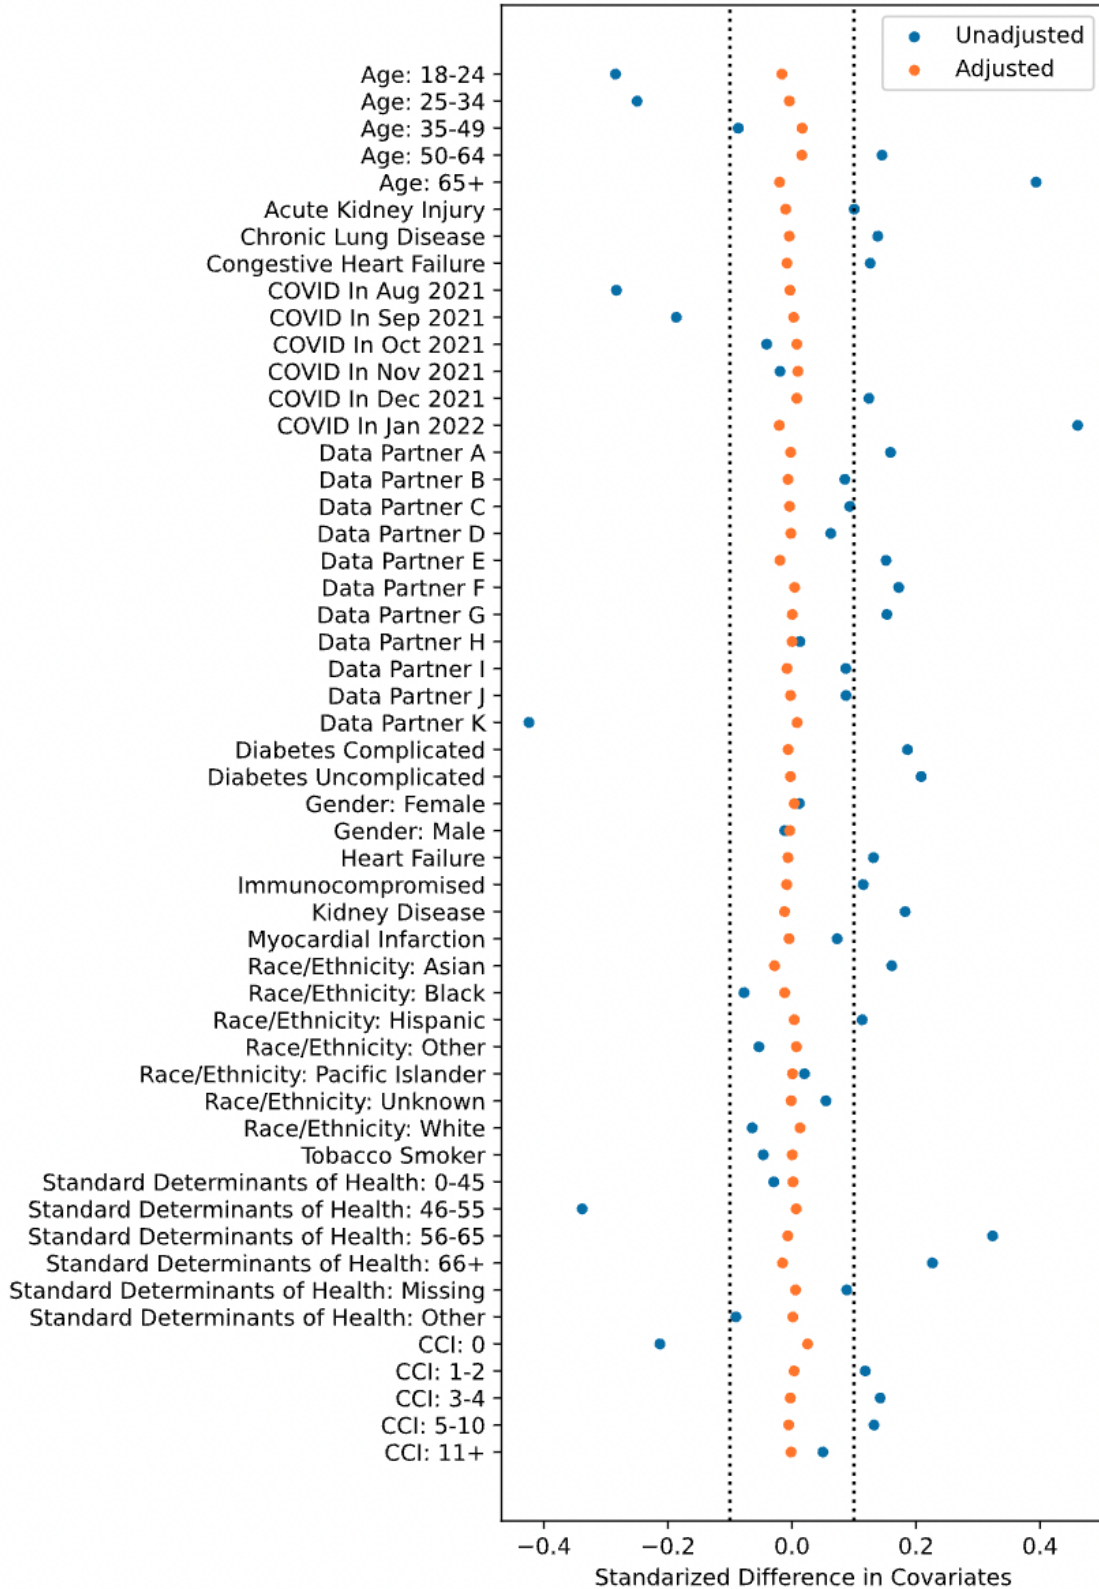

**eFigure 2. Differences in standardized covariates in the clinic-based cohort between vaccinated and unvaccinated groups before (unadjusted) and after (adjusted) IPTW.**

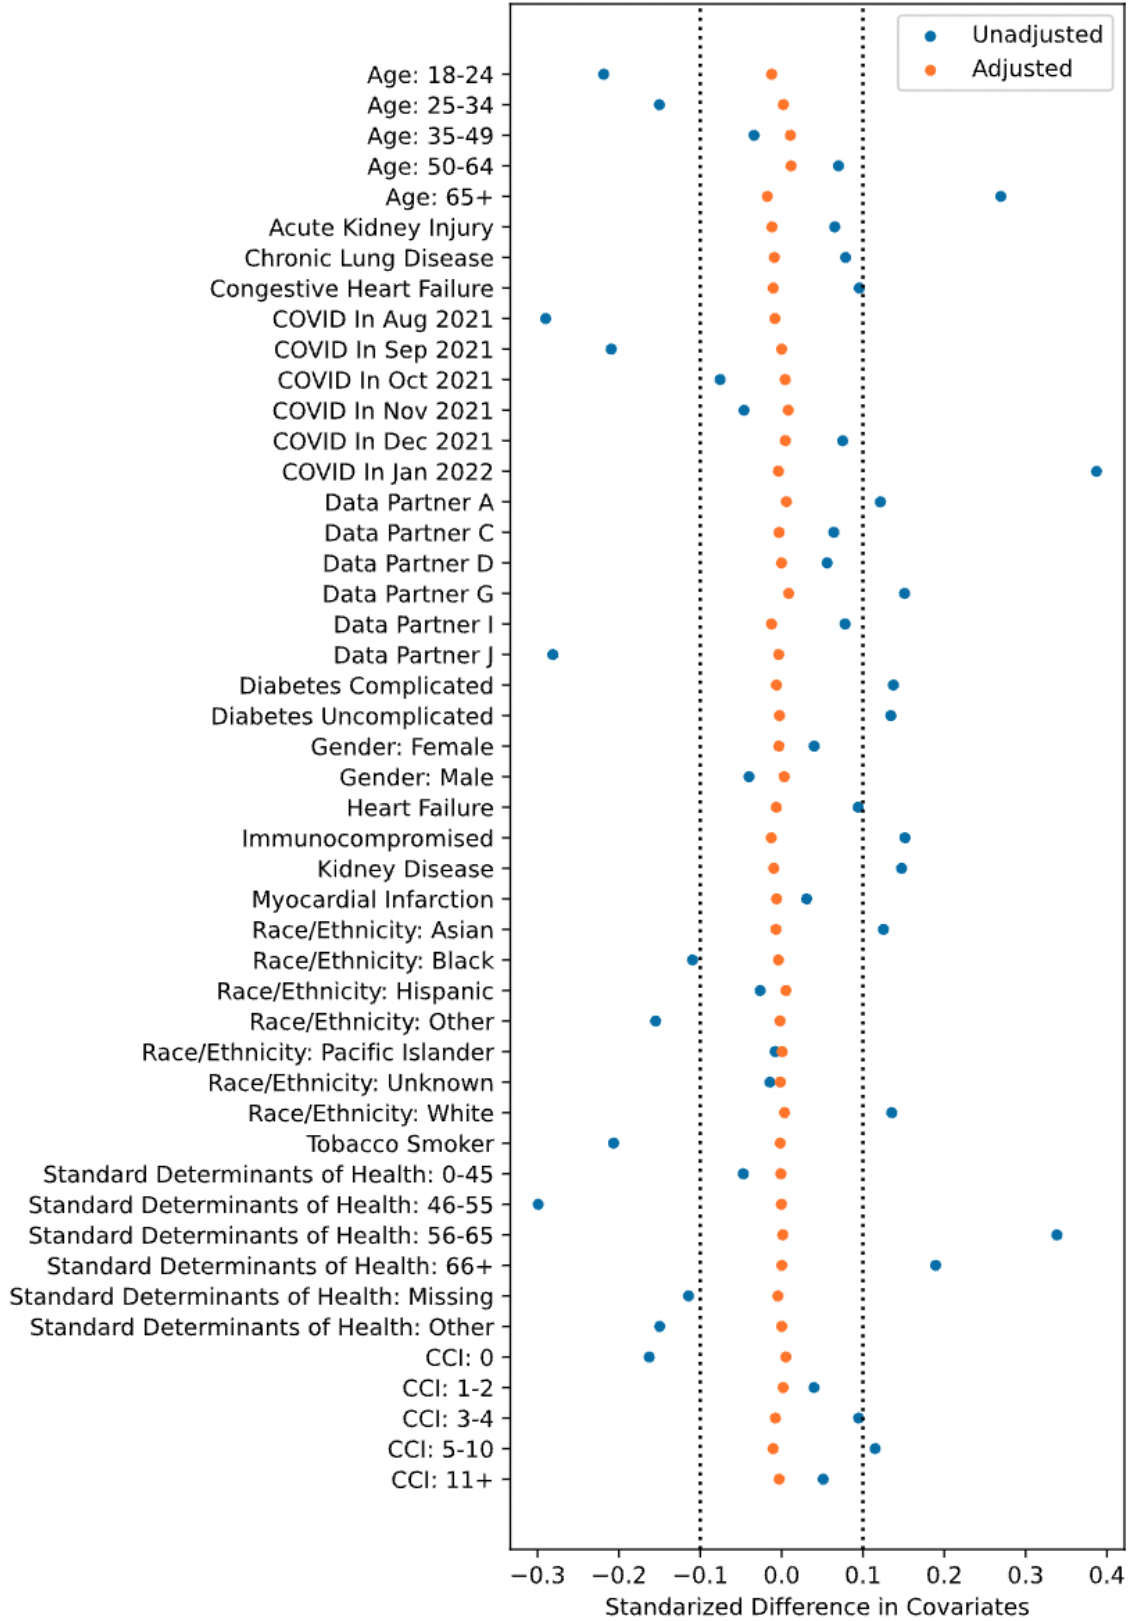



**eTable 7. Associations of Age with Vaccination and Long COVID**

|                     | Age at COVID Index Date | Overall        | Fully Vaccinated | Unvaccinated   | With Long COVID | Without Long COVID |
|---------------------|-------------------------|----------------|------------------|----------------|-----------------|--------------------|
| Model-based Cohort  | All                     | 199498 (100.0) | 87099 (100.0)    | 112399 (100.0) | 3405 (100.0)    | 196093 (100.0)     |
|                     | 18-24                   | 20701 (10.4)   | 4922 (5.7)       | 15779 (14.0)   | 71 (2.1)        | 20630 (10.5)       |
|                     | 25-34                   | 36729 (18.4)   | 11382 (13.1)     | 25347 (22.6)   | 292 (8.6)       | 36437 (18.6)       |
|                     | 35-49                   | 53883 (27.0)   | 21646 (24.9)     | 32237 (28.7)   | 984 (28.9)      | 52899 (27.0)       |
|                     | 50-64                   | 50887 (25.5)   | 25332 (29.1)     | 25555 (22.7)   | 1175 (34.5)     | 49712 (25.4)       |
|                     | 65+                     | 37298 (18.7)   | 23817 (27.3)     | 13481 (12.0)   | 883 (25.9)      | 36415 (18.6)       |
| Clinic-based Cohort | All                     | 47752 (100.0)  | 26567 (100.0)    | 21185 (100.0)  | 706 (100.0)     | 47046 (100.0)      |
|                     | 18-24                   | 4522 (9.5)     | 1753 (6.6)       | 2769 (13.1)    | 22 (3.1)        | 4500 (9.6)         |
|                     | 25-34                   | 8557 (17.9)    | 4078 (15.3)      | 4479 (21.1)    | 68 (9.6)        | 8489 (18.0)        |
|                     | 35-49                   | 12445 (26.1)   | 6748 (25.4)      | 5697 (26.9)    | 194 (27.5)      | 12251 (26.0)       |
|                     | 50-64                   | 12356 (25.9)   | 7235 (27.2)      | 5121 (24.2)    | 232 (32.9)      | 12124 (25.8)       |
|                     | 65+                     | 9872 (20.7)    | 6753 (25.4)      | 3119 (14.7)    | 190 (26.9)      | 9682 (20.6)        |

**eFigure 3. Sensitivity analysis results for logistic regression (LR) and proportional hazards (PH), full LC Model threshold range.** Odds ratios for the vaccination coefficient are shown for LR, hazard ratios for the vaccination coefficient are shown for PH. Dashed lines are results from the clinic-based cohort, where the LC model cutoff is not relevant. Solid lines are results from the model-based cohort.

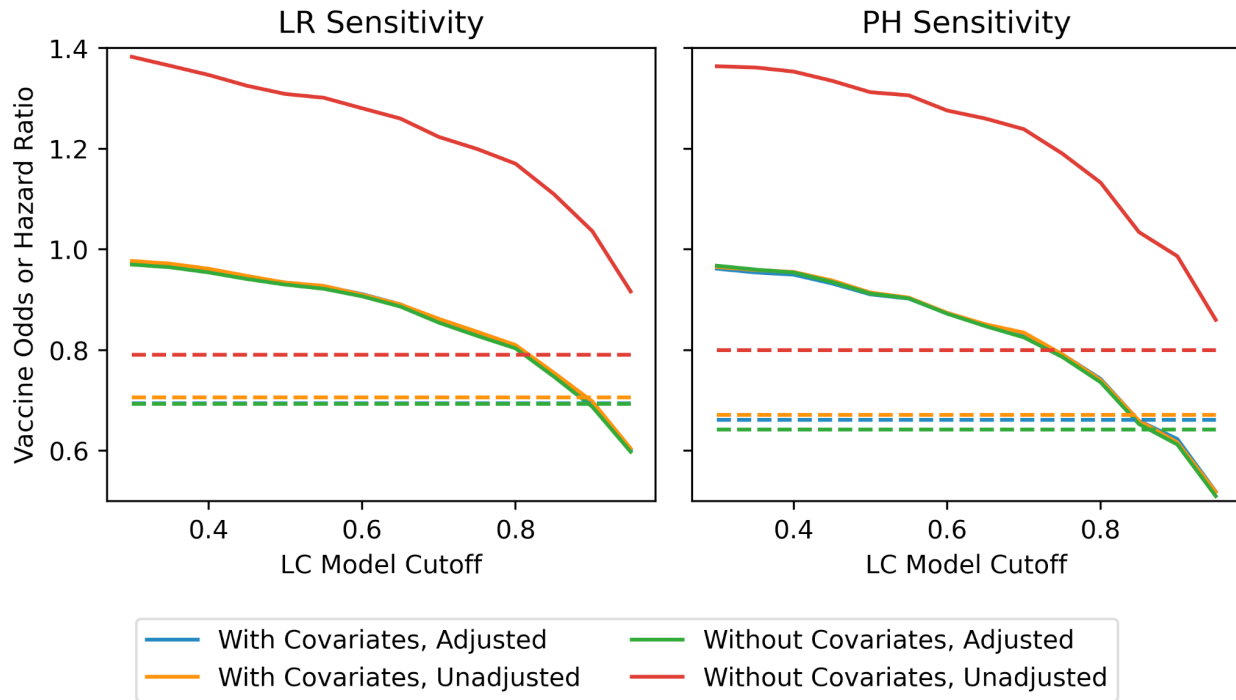

## eDiscussion

We do not interpret the associations between vaccination and long COVID here as causal, as we fail to fully account for two important conditions: unconfoundedness and latent variables.

### Unconfoundedness

Under certain assumptions, associations in IPTW-adjusted models can be interpreted as causal effects, even when treatment is not randomly assigned.<sup>1,2</sup> If we are willing to assume that there are no unmeasured confounders, IPTW satisfies the condition of exchangeability: the treatment and control groups differ in outcome only due to the treatment. We attempt to satisfy this assumption by controlling for the measured confounders outlined in eTables 1 and 2 in our treatment model. Nevertheless, we do not assume that there are no further confounders, largely due to the field's nascent understanding of long COVID. For example, a small cohort study suggested that reactivation of latent viruses may contribute to long COVID, but we do not include past viral infections in the treatment model.<sup>3</sup> Furthermore, some of the latent variables in our causal model are unobserved confounders, as discussed further below.

### Latent Variables

To assess the feasibility of interpreting our results causally, we developed a simplified, theoretical causal model of COVID-19 and long COVID. This model is illustrated with a directed acyclic graph (DAG) in eFigure 4 and reveals latent variables that present an obstacle to estimating the causal effect of COVID-19 vaccination on long COVID. Of particular concern is patient propensity to seek healthcare, which affects the likelihood that both COVID-19 vaccination and long COVID will be observed, and is common in research using electronic health records.<sup>4</sup>

**eFigure 4: Directed acyclic graph (DAG) of a simplified, theoretical causal model of COVID-19 vaccination and long COVID.**

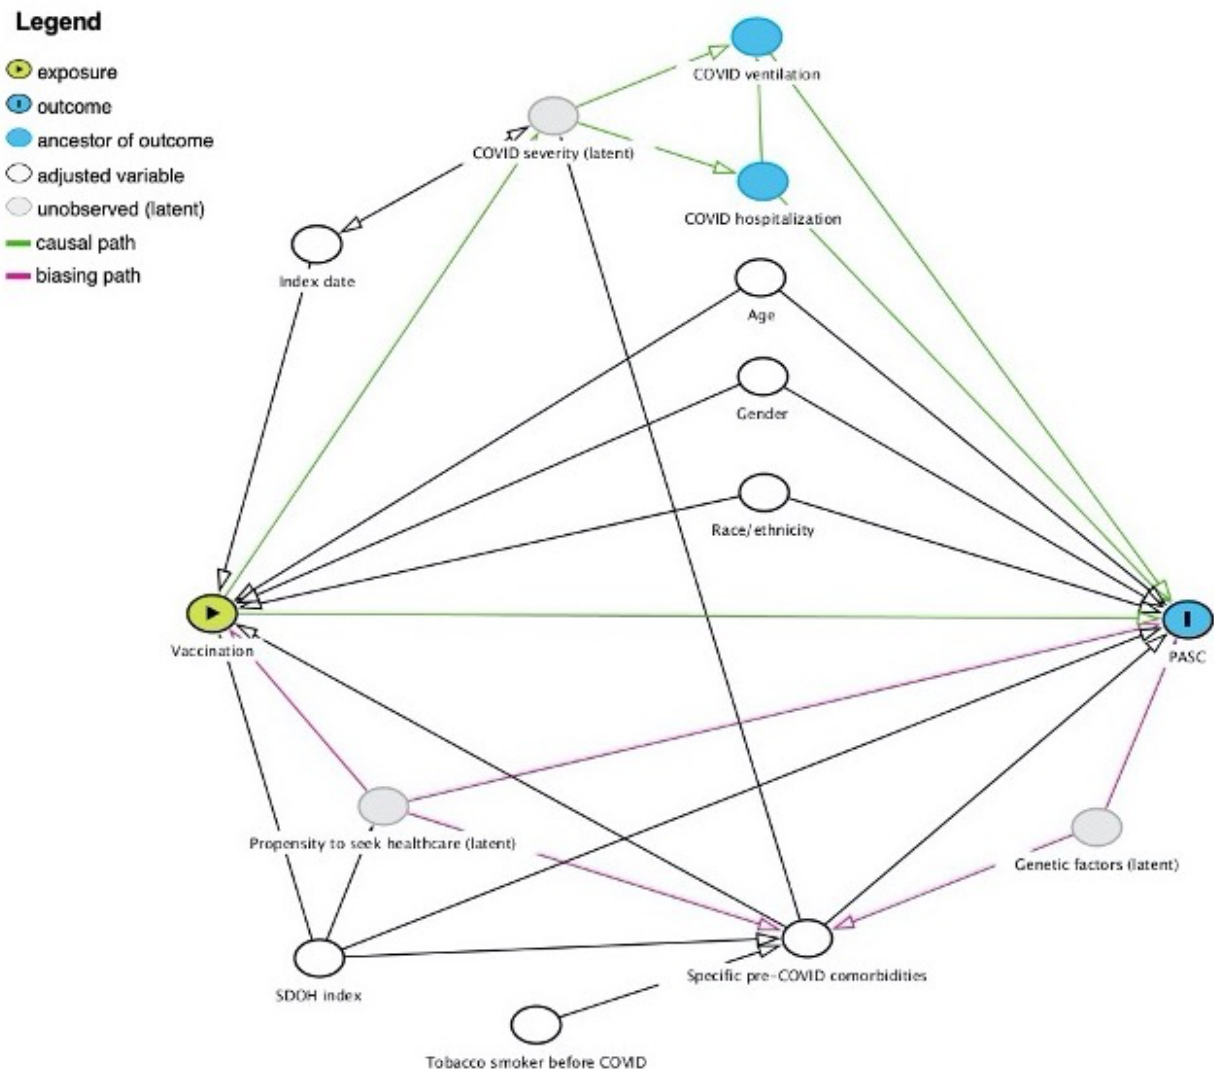

## eReferences

1. Hernán MA, Robins JM. Estimating causal effects from epidemiological data. *J Epidemiol Community Health*. 2006;60(7):578-586.
2. Chesnaye NC, Stel VS, Tripepi G, et al. An introduction to inverse probability of treatment weighting in observational research. *Clin Kidney J*. 2022;15(1):14-20.
3. Su Y, Yuan D, Chen DG, et al. Multiple early factors anticipate post-acute COVID-19 sequelae. *Cell*. 2022;185(5):881-895.e20.
4. Farmer R, Mathur R, Bhaskaran K, Eastwood SV, Chaturvedi N, Smeeth L. Promises and pitfalls of electronic health record analysis. *Diabetologia*. 2018;61(6):1241-1248.
